# Supplementary material for: Identification of an IFN-β-associated gene signature for the prediction of overall survival among glioblastoma patients
Source: PubMed Central journal article supplement — Ann Transl Med. 2021 Jun;9(11):925. doi: 10.21037/atm-21-1986 (PMC8263857; doi:10.21037/atm-21-1986), 2021-06
Supplement: atm-09-11-925-dss.pdf [file atm-09-11-925-dss.pdf]

## Data Sharing Statement

|                     |                                                                                                                                                     |                                                                                                                                             |
|---------------------|-----------------------------------------------------------------------------------------------------------------------------------------------------|---------------------------------------------------------------------------------------------------------------------------------------------|
| <b>Article Info</b> | <a href="http://dx.doi.org/10.21037/atm-21-1986">http://dx.doi.org/10.21037/atm-21-1986</a>                                                         |                                                                                                                                             |
| <b>Item</b>         | <b>Question</b>                                                                                                                                     | <b>Authors' Response<br/>(place "-" if not applicable)</b>                                                                                  |
| 1                   | Would you like to share data collected for your study to others?                                                                                    | Yes.                                                                                                                                        |
| 2                   | If not, would you like to share the reason for your decision?                                                                                       | -                                                                                                                                           |
| 3                   | What data in particular will be shared?                                                                                                             | The survival data in particular and the Cancer Genome Atlas (TCGA) GBM and GSE83300 dataset from the Gene Expression Omnibus will be shared |
| 4                   | Any other documents will be shared? Such as study protocol, statistical analysis plan, informed consent form, clinical study report, analytic code. | Statistical analysis plan and analytic code will also be shared if requested.                                                               |
| 5                   | When will data availability begin?                                                                                                                  | From the publication date.                                                                                                                  |
| 6                   | When will data availability end?                                                                                                                    | Two years within the publication date, since the technique or survival date may be updated over time.                                       |
| 7                   | To whom will you share the data?                                                                                                                    | Oncology and neurosurgery researchers who are interested in studies of IFN- $\beta$ .                                                       |
| 8                   | For what type of analysis or purpose?                                                                                                               | For analysis to evaluate the safety of IFN- $\beta$ in GBM patients                                                                         |
| 9                   | How or where can the data/documents be obtained?                                                                                                    | Emails could be sent to the address below to obtain the shared data:<br><a href="mailto:zhongshupeng@163.com">zhongshupeng@163.com</a>      |
| 10                  | Any other restrictions?                                                                                                                             | We may balance the potential benefits and risks for each request and then provide the data that could be shared.                            |
