# Supplementary material for: Identification of an IFN-β-associated gene signature for the prediction of overall survival among glioblastoma patients
Source: PubMed Central journal article supplement — Ann Transl Med. 2021 Jun;9(11):925. doi: 10.21037/atm-21-1986 (PMC8263857; doi:10.21037/atm-21-1986), 2021-06
Supplement: atm-09-11-925-supplementary.pdf [file atm-09-11-925-supplementary.pdf]

**Table S1** Differential gene expression analysis identified 14 downregulated and 53 upregulated IFN- $\beta$ -associated genes.

| gene    | conMean  | treatMean | logFC    | pValue   | fd       |
|---------|----------|-----------|----------|----------|----------|
| CD63    | 30.10657 | 313.0741  | 3.378354 | 0.000172 | 0.002036 |
| CD70    | 0.555679 | 2.200962  | 1.98581  | 0.000832 | 0.002797 |
| E2F1    | 3.505146 | 10.48335  | 1.580554 | 0.007463 | 0.013579 |
| FTL     | 651.6117 | 3210.001  | 2.300489 | 0.000599 | 0.002369 |
| GAPDH   | 512.1522 | 1157.601  | 1.176493 | 0.001146 | 0.00318  |
| GSTP1   | 32.61208 | 108.6335  | 1.735991 | 0.000337 | 0.002036 |
| LGALS1  | 17.39993 | 328.6125  | 4.239234 | 0.000206 | 0.002036 |
| MNT     | 6.166503 | 3.011482  | -1.03398 | 0.000325 | 0.002036 |
| NDUFB3  | 20.31884 | 32.20039  | 0.66426  | 0.021104 | 0.033464 |
| NFKBIA  | 10.93926 | 56.22313  | 2.361648 | 0.000779 | 0.002703 |
| PIN1    | 27.5438  | 14.49285  | -0.92639 | 0.001473 | 0.003803 |
| PRDX1   | 83.12447 | 162.8397  | 0.970107 | 0.00152  | 0.003833 |
| PRDX6   | 34.97637 | 82.92948  | 1.245504 | 0.000619 | 0.002369 |
| RPLP1   | 42.436   | 203.9833  | 2.26509  | 0.000149 | 0.002036 |
| RPS2    | 14.01768 | 276.6118  | 4.302543 | 0.000144 | 0.002036 |
| S100A2  | 0.755174 | 2.902967  | 1.942647 | 0.000237 | 0.002036 |
| SEC61B  | 12.62775 | 46.94838  | 1.894478 | 0.000144 | 0.002036 |
| SHC1    | 3.090129 | 19.56899  | 2.66283  | 0.000206 | 0.002036 |
| TMSB10  | 662.5164 | 1667.381  | 1.331555 | 0.003943 | 0.007816 |
| TP53I3  | 1.08063  | 8.602309  | 2.992851 | 0.000144 | 0.002036 |
| TPM2    | 3.217674 | 18.44204  | 2.518909 | 0.000916 | 0.002906 |
| TRAF3   | 5.798808 | 3.876128  | -0.58114 | 0.002193 | 0.00507  |
| TSHR    | 0.52064  | 1.21914   | 1.227504 | 0.008086 | 0.014477 |
| TXN     | 42.52225 | 70.3807   | 0.726962 | 0.01964  | 0.031595 |
| XRCC5   | 24.69804 | 41.33577  | 0.742994 | 0.000373 | 0.002072 |
| AKT1    | 5.828089 | 11.30404  | 0.955743 | 0.001341 | 0.003545 |
| AMPD2   | 17.22854 | 9.199601  | -0.90516 | 0.007264 | 0.013439 |
| BCL2L2  | 41.065   | 8.016368  | -2.35689 | 0.000144 | 0.002036 |
| BCL3    | 1.536024 | 7.403995  | 2.269103 | 0.000507 | 0.002369 |
| CASP7   | 1.701272 | 4.602387  | 1.435769 | 0.000428 | 0.002262 |
| CASP9   | 3.27981  | 4.734607  | 0.529632 | 0.022131 | 0.034119 |
| CHST15  | 7.984939 | 5.270313  | -0.59939 | 0.025479 | 0.038742 |
| CLK2    | 5.013503 | 9.431446  | 0.91166  | 0.002328 | 0.005274 |
| CXCL9   | 0.522583 | 2.959908  | 2.50182  | 0.000303 | 0.002036 |
| DDIT3   | 10.53898 | 39.86037  | 1.91922  | 0.004295 | 0.008364 |
| DNAJA1  | 81.49636 | 57.45116  | -0.5044  | 0.016566 | 0.027444 |
| DST     | 11.587   | 4.898513  | -1.24209 | 0.000619 | 0.002369 |
| ENO3    | 1.078342 | 1.936191  | 0.844407 | 0.002866 | 0.006118 |
| ETV4    | 0.449016 | 5.842307  | 3.7017   | 0.000524 | 0.002369 |
| FAS     | 1.211993 | 5.397376  | 2.154877 | 0.000619 | 0.002369 |
| FGF9    | 2.489786 | 1.05976   | -1.23228 | 0.002193 | 0.00507  |
| HLA-B   | 13.25433 | 323.677   | 4.610019 | 0.000185 | 0.002036 |
| HLA-C   | 21.08252 | 260.7631  | 3.62862  | 0.000214 | 0.002036 |
| HRK     | 4.302541 | 1.496812  | -1.5233  | 0.000887 | 0.002896 |
| HSP90B1 | 53.99334 | 105.0129  | 0.959713 | 0.002193 | 0.00507  |
| IFITM3  | 37.89578 | 210.6592  | 2.474802 | 0.001146 | 0.00318  |
| IGFBP5  | 15.80209 | 156.8898  | 3.311564 | 0.001075 | 0.00318  |
| IL15RA  | 0.909774 | 1.710014  | 0.910427 | 0.000337 | 0.002036 |
| IL18    | 1.533749 | 6.167387  | 2.007597 | 0.00111  | 0.00318  |
| IRF1    | 1.646495 | 5.161978  | 1.648526 | 0.001146 | 0.00318  |
| KDM5A   | 2.286764 | 3.631279  | 0.66717  | 0.001943 | 0.004792 |
| MAP3K14 | 1.968346 | 4.329348  | 1.137166 | 0.000348 | 0.002036 |
| MAPK1   | 37.5546  | 15.92404  | -1.23778 | 0.00126  | 0.003411 |
| MAPK10  | 16.65285 | 4.83445   | -1.78434 | 0.000683 | 0.002529 |
| MC4R    | 1.741701 | 0.887979  | -0.9719  | 0.000328 | 0.002036 |
| MMP7    | 0.39799  | 4.360563  | 3.453711 | 0.003039 | 0.006247 |
| NFKB1   | 3.08316  | 5.389852  | 0.805836 | 0.002546 | 0.005653 |
| PER2    | 4.063261 | 2.574965  | -0.65809 | 0.006518 | 0.012263 |
| PTPRZ1  | 9.053498 | 136.0179  | 3.909177 | 0.000542 | 0.002369 |
| RPGR    | 1.267263 | 2.035992  | 0.684016 | 0.002952 | 0.006181 |
| STAT1   | 11.88487 | 29.58109  | 1.315548 | 0.002866 | 0.006118 |
| TIMP3   | 1.351658 | 2.491341  | 0.882192 | 0.014275 | 0.024759 |
| TLX1    | 0.606327 | 1.01475   | 0.742957 | 0.000764 | 0.002703 |
| TNFSF14 | 0.682826 | 1.188035  | 0.798987 | 0.003129 | 0.006316 |
| TP53    | 1.339876 | 18.70788  | 3.803475 | 0.000179 | 0.002036 |
| TRAIIP  | 1.100777 | 2.933994  | 1.414344 | 0.000314 | 0.002036 |
| VCAM1   | 0.722361 | 10.0756   | 3.802003 | 0.000619 | 0.002369 |

**Table S2** Univariate Cox regression model found 5 survival-related genes

| id     | HR       | HR.95L   | HR.95H   | pvalue   |
|--------|----------|----------|----------|----------|
| PRDX1  | 1.002986 | 1.000224 | 1.005755 | 0.034085 |
| SEC61B | 1.018342 | 1.005051 | 1.03181  | 0.006698 |
| TXN    | 1.007272 | 1.000557 | 1.014032 | 0.03375  |
| XRCC5  | 1.025477 | 1.005747 | 1.045595 | 0.011145 |
| BCL2L2 | 0.944842 | 0.894724 | 0.997768 | 0.041319 |

**Table S3** Lasso-penalized Cox analysis identified 5 genes to construct the prognostic model

| id           | ftime    | fustat | PRDX1    | SEC61B   | TXN      | XRCC5    | BCL2L2     | riskScore | risk |
|--------------|----------|--------|----------|----------|----------|----------|------------|-----------|------|
| TCGA-19-5960 | 0.013699 | 0      | 140.3251 | 29.66717 | 42.88298 | 69.56536 | 8.375261   | 1.564664  | high |
| TCGA-06-5418 | 0.019178 | 0      | 118.8639 | 39.67598 | 64.92846 | 33.20539 | 12.76465   | 0.848628  | low  |
| TCGA-12-1597 | 0.054795 | 0      | 142.8102 | 49.3957  | 51.56646 | 40.8878  | 6.976729   | 1.180437  | low  |
| TCGA-32-4213 | 0.071233 | 0      | 138.0042 | 40.21844 | 32.29656 | 40.58741 | 5.224391   | 1.129728  | low  |
| TCGA-14-0871 | 0.076712 | 0      | 98.02954 | 84.35446 | 76.9631  | 69.41546 | 6.750546   | 1.831538  | high |
| TCGA-14-0790 | 0.093151 | 0      | 173.3056 | 56.72675 | 67.44097 | 35.26562 | 3.706071   | 1.260257  | high |
| TCGA-32-2616 | 0.123288 | 0      | 136.5546 | 37.67904 | 84.84546 | 41.9269  | 7.657441   | 1.167249  | low  |
| TCGA-28-2509 | 0.128767 | 0      | 167.6415 | 46.34816 | 100.2417 | 33.30769 | 5.840747   | 1.168708  | low  |
| TCGA-06-2558 | 0.134247 | 0      | 206.7004 | 54.56901 | 64.06912 | 50.17674 | 9.021406   | 1.468887  | high |
| TCGA-27-1831 | 0.147945 | 0      | 224.5134 | 85.01386 | 76.92627 | 30.65479 | 1.804257   | 1.459245  | high |
| TCGA-19-4065 | 0.156164 | 0      | 111.5957 | 80.26543 | 175.2979 | 37.46402 | 16.77551   | 1.189536  | high |
| TCGA-76-4928 | 0.186301 | 0      | 126.2451 | 59.36295 | 101.6404 | 43.99712 | 7.968783   | 1.308979  | high |
| TCGA-02-2483 | 0.224658 | 0      | 103.1318 | 78.0226  | 221.6511 | 82.41142 | 6.414456   | 2.271565  | high |
| TCGA-06-2565 | 0.257534 | 0      | 134.3475 | 34.55243 | 41.9556  | 39.66919 | 9.606255   | 1.002286  | low  |
| TCGA-06-0221 | 0.263014 | 0      | 109.8401 | 20.9592  | 35.09466 | 45.88823 | 22.92124   | 0.718923  | low  |
| TCGA-19-2620 | 0.268493 | 0      | 171.5653 | 34.255   | 45.71353 | 24.66921 | 13.49417   | 0.719022  | low  |
| TCGA-08-0386 | 0.268493 | 0      | 157.493  | 41.18219 | 81.36895 | 60.2722  | 11.21148   | 1.479606  | high |
| TCGA-28-5208 | 0.271233 | 0      | 233.758  | 52.12235 | 82.99764 | 57.8433  | 7.005562   | 1.717449  | high |
| TCGA-19-1787 | 0.273973 | 0      | 134.0508 | 38.18114 | 62.76541 | 51.43739 | 5.878342   | 1.343401  | high |
| TCGA-06-5412 | 0.279452 | 0      | 158.7072 | 41.60444 | 49.7972  | 36.22516 | 9.70667    | 1.027343  | low  |
| TCGA-19-1389 | 0.284932 | 0      | 143.523  | 45.00921 | 147.8676 | 42.3617  | 8.237626   | 1.305182  | high |
| TCGA-26-5134 | 0.287671 | 0      | 143.8337 | 71.34361 | 87.63025 | 42.11121 | 4.609562   | 1.41316   | high |
| TCGA-06-2561 | 0.30137  | 0      | 129.4165 | 26.95697 | 27.06816 | 35.69237 | 9.664078   | 0.860468  | low  |
| TCGA-06-0174 | 0.309589 | 0      | 135.2137 | 42.86477 | 42.50185 | 58.87772 | 5.421822   | 1.428654  | high |
| TCGA-27-2524 | 0.312329 | 0      | 154.5816 | 100.9761 | 166.88   | 43.40007 | 6.635765   | 1.674917  | high |
| TCGA-32-5222 | 0.315068 | 0      | 249.77   | 52.27965 | 88.19906 | 50.01179 | 4.78742    | 1.657946  | high |
| TCGA-41-5651 | 0.326027 | 0      | 152.466  | 40.48911 | 116.6978 | 60.24457 | 10.65221   | 1.530896  | high |
| TCGA-06-0158 | 0.331507 | 0      | 120.1098 | 32.92711 | 39.32712 | 32.09478 | 10.14526   | 0.814416  | low  |
| TCGA-06-0138 | 0.345205 | 0      | 152.6425 | 54.89752 | 85.10129 | 28.5542  | 2.827759   | 1.135179  | low  |
| TCGA-14-2554 | 0.347945 | 0      | 168.2275 | 63.95563 | 73.87036 | 35.23214 | 5.07638    | 1.266138  | high |
| TCGA-28-5204 | 0.350685 | 0      | 127.6719 | 28.99288 | 71.11637 | 44.76476 | 9.008068   | 1.112678  | low  |
| TCGA-19-1390 | 0.356164 | 0      | 48.07005 | 36.19385 | 27.43887 | 37.05623 | 5.534106   | 0.866978  | low  |
| TCGA-06-0646 | 0.364384 | 0      | 99.09356 | 35.56775 | 46.89974 | 43.21746 | 4.947798   | 1.111174  | low  |
| TCGA-12-0618 | 0.364384 | 0      | 67.443   | 54.4239  | 120.9357 | 59.02999 | 9.576032   | 1.448237  | high |
| TCGA-28-5209 | 0.369863 | 0      | 229.5587 | 38.23931 | 69.0032  | 45.6831  | 7.450065   | 1.390104  | high |
| TCGA-26-5136 | 0.372603 | 0      | 192.7499 | 71.43491 | 108.2516 | 49.15737 | 12.54333   | 1.498292  | high |
| TCGA-12-5295 | 0.389041 | 0      | 301.1052 | 63.88231 | 125.8404 | 46.04834 | 2.670659   | 1.835403  | high |
| TCGA-32-1970 | 0.394521 | 0      | 108.0138 | 22.59641 | 25.95279 | 37.36755 | 9.544778   | 0.831774  | low  |
| TCGA-28-2499 | 0.39726  | 0      | 287.5934 | 24.36353 | 31.9343  | 35.21199 | 3.168737   | 1.271774  | high |
| TCGA-02-2485 | 0.4      | 0      | 122.7897 | 37.32248 | 42.40419 | 64.6278  | 6.116927   | 1.525002  | high |
| TCGA-06-5413 | 0.4      | 0      | 235.1694 | 60.04048 | 59.99449 | 60.03172 | 5.626302   | 1.792517  | high |
| TCGA-06-0139 | 0.405479 | 0      | 180.1379 | 62.03357 | 101.702  | 28.21095 | 3.903835   | 1.216003  | high |
| TCGA-06-0744 | 0.413699 | 0      | 142.3851 | 54.56737 | 29.33902 | 31.89612 | 7.657043   | 0.992391  | low  |
| TCGA-06-5411 | 0.419178 | 0      | 174.0267 | 48.40504 | 97.56886 | 39.33645 | 16.05117   | 1.084493  | low  |
| TCGA-06-0686 | 0.421918 | 0      | 193.3583 | 52.96145 | 57.03175 | 39.39186 | 7.497999   | 1.260213  | high |
| TCGA-06-0129 | 0.430137 | 1      | 64.39262 | 28.57973 | 30.56102 | 47.85222 | 9.750011   | 0.975217  | low  |
| TCGA-06-2567 | 0.438356 | 1      | 171.171  | 34.98164 | 61.42383 | 57.83904 | 6.989487   | 1.488365  | high |
| TCGA-06-5408 | 0.452055 | 1      | 180.6637 | 52.13031 | 74.65464 | 54.80463 | 5.087023   | 1.591817  | high |
| TCGA-76-4927 | 0.487671 | 1      | 195.3624 | 54.4249  | 56.66848 | 39.63224 | 9.78166    | 1.227297  | high |
| TCGA-06-0878 | 0.487671 | 1      | 195.2847 | 50.80717 | 92.53551 | 49.44408 | 5.464186   | 1.532894  | high |
| TCGA-06-0644 | 0.490411 | 1      | 176.7468 | 77.41673 | 173.0849 | 52.90885 | 4.969178   | 1.820638  | high |
| TCGA-14-0789 | 0.512329 | 1      | 85.53151 | 30.52127 | 53.45421 | 32.2351  | 9.854335   | 0.769117  | low  |
| TCGA-27-1837 | 0.512329 | 1      | 170.7995 | 39.68927 | 45.59562 | 28.03151 | 8.16817    | 0.915896  | low  |
| TCGA-12-5299 | 0.517808 | 1      | 201.5399 | 71.76869 | 99.38701 | 43.24753 | 5.812191   | 1.53445   | high |
| TCGA-76-4929 | 0.545205 | 1      | 132.1505 | 47.63228 | 72.17132 | 59.83373 | 4.660162   | 1.578536  | high |
| TCGA-06-0210 | 0.558904 | 1      | 132.6637 | 23.60292 | 30.64785 | 36.9697  | 10.20039   | 0.867921  | low  |
| TCGA-32-2638 | 0.578082 | 1      | 138.0039 | 35.93231 | 54.23497 | 31.32749 | 8.398541   | 0.906184  | low  |
| TCGA-76-4931 | 0.59726  | 1      | 206.52   | 46.3373  | 45.81722 | 44.76383 | 11.05181   | 1.260377  | high |
| TCGA-15-0742 | 0.613699 | 1      | 140.2915 | 51.77297 | 51.50417 | 39.23977 | 7.642791   | 1.143086  | low  |
| TCGA-06-0211 | 0.632877 | 1      | 137.4622 | 40.34184 | 37.00743 | 43.08321 | 7.17278    | 1.141582  | low  |
| TCGA-16-1045 | 0.632877 | 1      | 189.5629 | 21.41512 | 33.77338 | 35.13166 | 6.343518   | 1.012997  | low  |
| TCGA-06-0750 | 0.635616 | 1      | 214.1866 | 67.80955 | 105.8879 | 28.75555 | 5.671292   | 1.285691  | high |
| TCGA-27-2519 | 0.635616 | 1      | 246.4598 | 54.09209 | 75.02524 | 41.32633 | 3.477736   | 1.508975  | high |
| TCGA-28-2513 | 0.643836 | 1      | 92.4272  | 46.08829 | 59.67444 | 31.23411 | 6.011135   | 0.927367  | low  |
| TCGA-02-2486 | 0.649315 | 1      | 202.8742 | 51.72237 | 134.1644 | 42.58534 | 9.683138   | 1.399915  | high |
| TCGA-28-5207 | 0.660274 | 1      | 249.7809 | 36.48221 | 56.77898 | 45.59285 | 8.330949   | 1.380562  | high |
| TCGA-26-5139 | 0.663014 | 1      | 142.0489 | 42.97583 | 59.73121 | 31.55857 | 9.442725   | 0.938152  | low  |
| TCGA-27-1834 | 0.668493 | 1      | 173.8029 | 40.20974 | 64.40529 | 39.56591 | 7.562747   | 1.175947  | low  |
| TCGA-41-3915 | 0.70137  | 1      | 110.5389 | 50.78608 | 65.69816 | 35.63073 | 4.583821   | 1.102399  | low  |
| TCGA-06-0219 | 0.70137  | 1      | 284.344  | 71.72125 | 116.4953 | 35.94176 | 3.115479   | 1.633877  | high |
| TCGA-14-1034 | 0.717808 | 1      | 78.00486 | 36.94946 | 44.68549 | 69.12016 | 13.87659   | 1.365421  | high |
| TCGA-28-5216 | 0.745205 | 1      | 233.103  | 68.47629 | 126.0057 | 43.57916 | 7.246914   | 1.592525  | high |
| TCGA-06-0130 | 0.758904 | 1      | 151.6874 | 59.51141 | 153.388  | 37.89631 | 5.606221   | 1.370916  | high |
| TCGA-32-1980 | 0.764384 | 1      | 179.2239 | 34.27197 | 96.54481 | 28.55438 | 23.48885   | 0.672392  | low  |
| TCGA-32-2634 | 0.772603 | 1      | 162.9924 | 51.91409 | 74.72735 | 77.57591 | 6.695917   | 1.942323  | high |
| TCGA-27-2523 | 0.772603 | 1      | 306.2665 | 52.58156 | 49.13376 | 49.97735 | 8.001871   | 1.637298  | high |
| TCGA-26-5133 | 0.780822 | 1      | 107.9234 | 52.95517 | 90.52421 | 50.55217 | 11.62783   | 1.272051  | high |
| TCGA-12-0821 | 0.783562 | 1      | 213.9815 | 41.63904 | 49.7821  | 51.27075 | 4.013296   | 1.523024  | high |
| TCGA-06-0743 | 0.786301 | 1      | 132.5178 | 47.62646 | 57.33837 | 20.91613 | 4.887153   | 0.83911   | low  |
| TCGA-26-5135 | 0.794521 | 1      | 97.98138 | 51.72713 | 38.20319 | 28.82615 | 11.2631    | 0.779261  | low  |
| TCGA-06-0745 | 0.810959 | 1      | 200.6202 | 70.09513 | 73.81489 | 34.8811  | 3.279742   | 1.385898  | high |
| TCGA-19-2629 | 0.816438 | 1      | 149.4207 | 47.73915 | 59.70498 | 57.72573 | 5.361791   | 1.538915  | high |
| TCGA-06-0649 | 0.821918 | 1      | 184.1714 | 42.66877 | 55.02432 | 26.83747 | 3.84453    | 1.036828  | low  |
| TCGA-19-2625 | 0.835616 | 1      | 168.2398 | 42.77317 | 56.27156 | 27.66384 | 4.121188   | 1.019349  | low  |
| TCGA-14-1823 | 0.841096 | 1      | 244.1291 | 57.43299 | 142.4175 | 42.67542 | 2.630909   | 1.663639  | high |
| TCGA-14-0817 | 0.876712 | 1      | 292.8486 | 82.6027  | 139.8963 | 46.5586  | 2.909204   | 1.935509  | high |
| TCGA-06-0125 | 0.882192 | 1      | 98.89503 | 26.41783 | 54.53219 | 34.74653 | 7.94453    | 0.861279  | low  |
| TCGA-12-3653 | 0.89589  | 1      | 150.4582 | 26.95858 | 15.78032 | 44.80021 | 3.654312   | 1.174116  | low  |
| TCGA-06-5859 | 0.89589  | 1      | 184.9683 | 39.76688 | 65.82692 | 47.17211 | 6.482991   | 1.358275  | high |
| TCGA-27-1835 | 0.89863  | 1      | 199.1631 | 40.6902  | 57.34481 | 29.29569 | 4.377708   | 1.092263  | low  |
| TCGA-16-0846 | 0.90137  | 1      | 194.5448 | 39.89706 | 53.27018 | 30.62852 | 12.18135   | 0.936065  | low  |
| TCGA-06-2557 | 0.936986 | 1      | 202.47   | 28.04383 | 47.36417 | 47.15006 | 9.956309   | 1.233923  | high |
| TCGA-06-5417 | 0.947945 | 1      | 153.9124 | 48.00988 | 39.71992 | 73.74442 | 4.761712   | 1.824675  | high |
| TCGA-06-5416 | 0.950685 | 1      | 221.3037 | 63.22576 | 139.8653 | 46.6906  | 3.720026   | 1.6967    | high |
| TCGA-14-1825 | 0.961644 | 1      | 256.05   | 58.68413 | 56.40678 | 56.05472 | 3.89726    | 1.782033  | high |
| TCGA-28-1753 | 0.980822 | 1      | 171.5687 | 40.83743 | 52.40134 | 40.02558 | 7.762524   | 1.161219  | low  |
| TCGA-41-2571 | 0.986301 | 1      | 157.2702 | 51.18373 | 155.181  | 31.91235 | 10.95407   | 1.122988  | low  |
| TCGA-06-5414 | 1.019178 | 1      | 110.792  | 36.88267 | 27.16114 | 37.16333 | 8.885071   | 0.917248  | low  |
| TCGA-27-2526 | 1.049315 | 1      | 464.1159 | 74.75511 | 96.82345 | 29.17577 | 2.742156   | 1.832725  | high |
| TCGA-12-0619 | 1.054795 | 1      | 145.8938 | 39.38512 | 88.58783 | 50.39442 | 13.92942</ |           |      |

Table S4 The result is validated on the GEO datasets (GSE83300)

| id         | futime   | fustat | PRDX1    | SEC61B   | TXN      | XRCC5    | BCL2L2   | riskScore | risk |
|------------|----------|--------|----------|----------|----------|----------|----------|-----------|------|
| GSM2198606 | 1.421096 | 1      | 158.5011 | 47.44586 | 70.23023 | 43.02052 | 6.151619 | 1.283959  | high |
| GSM2198621 | 1.089041 | 1      | 158.6632 | 45.31044 | 67.63565 | 40.81352 | 8.719337 | 1.176295  | low  |
| GSM2198638 | 1.248493 | 1      | 159.0652 | 46.06398 | 68.78135 | 43.68051 | 8.227831 | 1.245121  | high |
| GSM2198650 | 0.810411 | 1      | 162.2663 | 47.31064 | 71.20021 | 43.43334 | 10.75034 | 1.203611  | high |
| GSM2198635 | 1.431781 | 1      | 160.879  | 43.46473 | 70.48607 | 36.49387 | 14.22017 | 0.98221   | low  |
| GSM2198625 | 0.961644 | 1      | 161.0721 | 44.92775 | 70.02774 | 36.63123 | 13.75186 | 1.00116   | low  |
| GSM2198647 | 0.507945 | 1      | 162.0038 | 48.29496 | 70.6601  | 41.88264 | 4.096471 | 1.316984  | high |
| GSM2198631 | 1.132603 | 1      | 160.2842 | 46.93892 | 70.90604 | 41.20961 | 5.462799 | 1.266941  | high |
| GSM2198649 | 1.596986 | 1      | 158.1686 | 47.78961 | 71.58481 | 43.75235 | 5.911007 | 1.305436  | high |
| GSM2198640 | 0.756986 | 0      | 161.1215 | 43.29883 | 70.36428 | 35.91489 | 15.40181 | 0.946496  | low  |
| GSM2198628 | 0.656712 | 1      | 160.5564 | 45.56183 | 69.81504 | 43.22226 | 9.63876  | 1.209254  | high |
| GSM2198626 | 2.232329 | 1      | 161.9134 | 47.65329 | 72.82851 | 42.19876 | 10.42718 | 1.191133  | high |
| GSM2198634 | 1.44     | 1      | 161.1763 | 46.13161 | 71.83742 | 41.25074 | 8.545298 | 1.20275   | high |
| GSM2198623 | 0.877808 | 1      | 160.6083 | 46.54484 | 66.71349 | 43.80434 | 9.330568 | 1.226516  | high |
| GSM2198617 | 3.523562 | 0      | 162.1622 | 44.61726 | 66.11918 | 41.6441  | 2.917961 | 1.312973  | high |
| GSM2198619 | 2.870137 | 0      | 162.0734 | 44.65216 | 70.37382 | 36.59659 | 13.43372 | 1.00817   | low  |
| GSM2198622 | 0.535068 | 1      | 164.6226 | 44.88713 | 67.61092 | 41.70163 | 8.282754 | 1.210514  | high |
| GSM2198610 | 1.116164 | 1      | 161.8135 | 43.3809  | 68.12242 | 40.0803  | 15.26726 | 1.023949  | low  |
| GSM2198632 | 2.134521 | 0      | 159.6826 | 43.17884 | 68.49758 | 40.88172 | 8.584207 | 1.173276  | low  |
| GSM2198636 | 1.296986 | 0      | 161.6886 | 45.27234 | 66.87629 | 39.81109 | 5.099265 | 1.237431  | high |
| GSM2198624 | 2.767397 | 1      | 158.7431 | 44.7161  | 66.01263 | 42.6376  | 5.592995 | 1.2696    | high |
| GSM2198633 | 1.578082 | 1      | 160.4605 | 44.80295 | 68.14713 | 41.38813 | 3.651932 | 1.293815  | high |
| GSM2198608 | 1.029863 | 1      | 158.9377 | 46.65563 | 69.46389 | 42.53322 | 9.629252 | 1.198582  | high |
| GSM2198645 | 1.60274  | 1      | 158.2679 | 44.48455 | 67.56667 | 39.879   | 8.103859 | 1.167172  | low  |
| GSM2198616 | 1.496712 | 1      | 161.0128 | 48.33633 | 70.8353  | 41.24672 | 9.134263 | 1.199222  | high |
| GSM2198613 | 2.599726 | 0      | 161.6886 | 47.2491  | 69.88271 | 40.11478 | 7.669721 | 1.203527  | high |
| GSM2198651 | 1.762192 | 0      | 160.6083 | 47.52619 | 69.13951 | 41.60163 | 7.064177 | 1.241606  | high |
| GSM2198627 | 1.807397 | 0      | 160.4605 | 46.42049 | 69.98005 | 42.1178  | 9.307213 | 1.2001    | high |
| GSM2198629 | 1.070137 | 1      | 160.474  | 45.08372 | 69.32687 | 39.7867  | 11.17931 | 1.111084  | low  |
| GSM2198612 | 3.802192 | 1      | 159.6018 | 47.04356 | 72.87525 | 45.81499 | 4.9017   | 1.365196  | high |
| GSM2198620 | 1.343014 | 1      | 161.8791 | 46.79922 | 67.10441 | 39.72549 | 5.935078 | 1.226505  | high |
| GSM2198648 | 0.908219 | 1      | 162.2194 | 47.8651  | 71.32424 | 41.72115 | 10.87167 | 1.172471  | low  |
| GSM2198639 | 3.488219 | 0      | 158.7135 | 43.76471 | 68.71442 | 36.12018 | 13.30507 | 0.989212  | low  |
| GSM2198641 | 1.52137  | 1      | 159.1846 | 47.14843 | 69.2003  | 39.60023 | 5.552775 | 1.232018  | high |
| GSM2198655 | 0.77589  | 1      | 158.8376 | 47.70972 | 69.35851 | 41.88617 | 6.496708 | 1.256579  | high |
| GSM2198630 | 2.942466 | 1      | 162.7697 | 45.57526 | 67.29524 | 40.61352 | 4.543426 | 1.267757  | high |
| GSM2198614 | 0.367397 | 1      | 159.4361 | 45.881   | 71.25549 | 39.31793 | 8.740576 | 1.158004  | low  |
| GSM2198637 | 0.759452 | 1      | 160.773  | 46.15948 | 68.38086 | 42.90547 | 6.849474 | 1.262572  | high |
| GSM2198611 | 2.1      | 1      | 160.9429 | 47.59477 | 73.38612 | 42.10188 | 8.165656 | 1.235151  | high |
| GSM2198607 | 3.510411 | 0      | 161.8217 | 44.73034 | 70.06024 | 37.67286 | 12.52959 | 1.04614   | low  |
| GSM2198653 | 0.913151 | 1      | 160.2465 | 43.58849 | 70.04769 | 38.88511 | 14.75297 | 1.013733  | low  |
| GSM2198609 | 0.683836 | 1      | 161.0047 | 47.56048 | 70.99878 | 42.42731 | 7.386254 | 1.253707  | high |
| GSM2198644 | 1.483562 | 1      | 157.1923 | 46.75535 | 70.47631 | 39.39552 | 8.940903 | 1.154179  | low  |
| GSM2198652 | 2.610411 | 1      | 158.0662 | 43.4521  | 69.93959 | 37.25537 | 15.00604 | 0.973787  | low  |
| GSM2198615 | 1.367671 | 1      | 160.5731 | 43.20611 | 69.4625  | 37.36482 | 15.62775 | 0.965573  | low  |
| GSM2198646 | 1.875616 | 0      | 161.0646 | 45.08518 | 68.30957 | 40.04181 | 9.239542 | 1.155666  | low  |
| GSM2198643 | 0.980548 | 1      | 160.9683 | 45.93237 | 69.55838 | 42.18097 | 7.952068 | 1.227394  | high |
| GSM2198642 | 1.527123 | 1      | 153.4301 | 46.47485 | 69.59679 | 38.71802 | 10.58431 | 1.098029  | low  |
| GSM2198654 | 1.043014 | 1      | 162.6299 | 47.85886 | 68.13601 | 42.66464 | 7.174759 | 1.262597  | high |
| GSM2198618 | 1.034795 | 1      | 158.1369 | 47.51073 | 68.69376 | 45.02126 | 7.87105  | 1.282224  | high |
